# Supplementary material for: Urbanization and Altitude Are Associated with Low Kidney Function in Peru
Source: PubMed Central journal article supplement (PMC6602110; doi:10.1089/ham.2018.0106), 2019-06-21
Supplement: Supp_TableS1.pdf [file Supp_TableS1.pdf]

## SUPPLEMENTARY MATERIAL

**Supplementary Table 1: Characteristics of the study population according to study site**

| Variable                                | Lima            | Arequipa        | Urb. Puno       | Tumbes          | Rur. Puno       | p-value |
|-----------------------------------------|-----------------|-----------------|-----------------|-----------------|-----------------|---------|
| Degree or urbanization                  | +++++           | ++++            | +++             | ++              | +               |         |
| Sex                                     | N=905           | N=1,682         | N=390           | N=901           | N=330           | 0.373   |
| Women                                   | 52.6            | 53.4            | 50.0            | 49.8            | 50.0            |         |
| Men                                     | 47.4            | 46.6            | 50.0            | 50.2            | 50.0            |         |
| Age                                     | N=905           | N=1,682         | N=390           | N=901           | N=330           | 0.444   |
| Mean (SD)                               | 57.1 (11.6)     | 57.3 (12.5)     | 57.0 (11.9)     | 58.1 (13.1)     | 57.3 (12.7)     |         |
| Has lived in this place, all your life? | N=1,095         |                 | N=762           | N=1,030         | N=699           | <0.001  |
| No                                      | 81.6            |                 | 31.6            | 35.0            | 3.6             |         |
| Yes                                     | 18.4            |                 | 68.4            | 65.0            | 96.4            |         |
| Education                               | N=904           | N=1,658         | N=390           | N=900           | N=330           | <0.001  |
| None                                    | 7.1             | 1.3             | 3.6             | 4.3             | 7.6             |         |
| Primary                                 | 33.4            | 14.5            | 8.2             | 49.6            | 49.4            |         |
| Secondary                               | 41.8            | 36.3            | 25.6            | 31.2            | 34.9            |         |
| Higher                                  | 17.7            | 47.9            | 62.6            | 14.9            | 8.2             |         |
| Diabetes                                | N=903           | N=1,653         | N=389           | N=901           | N=330           | <0.001  |
| No                                      | 90.4            | 92.9            | 90.8            | 86.1            | 95.2            |         |
| Yes                                     | 9.6             | 7.1             | 9.2             | 13.9            | 4.9             |         |
| Hypertension                            | N=904           | N=1,674         | N=379           | N=901           | N=311           | <0.001  |
| No                                      | 78.9            | 74.3            | 85.8            | 63.0            | 90.0            |         |
| Yes                                     | 21.1            | 25.8            | 14.3            | 37.0            | 10.0            |         |
| SBP                                     | N=904           | N=1,672         | N=379           | N=901           | N=311           | <0.001  |
| Mean (SD)                               | 117.4<br>(18.1) | 124.4<br>(20.6) | 110.0<br>(17.3) | 126.2<br>(21.3) | 111.5<br>(16.2) |         |
| DBP                                     | N=904           | N=1,672         | N=379           | N=901           | N=311           | <0.001  |

|                           |             |            |             |             |            |        |
|---------------------------|-------------|------------|-------------|-------------|------------|--------|
| Mean (SD)                 | 70.0 (10.4) | 79.6 (9.3) | 70.7 (10.8) | 76.1 (10.9) | 73.3 (9.8) |        |
| BMI categories            | N=901       | N=1,673    | N=379       | N=897       | N=311      | <0.001 |
| <25 Kg/m <sup>2</sup>     | 22.2        | 29.3       | 21.6        | 21.0        | 45.7       |        |
| 25-29.9 Kg/m <sup>2</sup> | 44.3        | 46.0       | 51.7        | 46.3        | 39.6       |        |
| ≥30 Kg/m <sup>2</sup>     | 33.5        | 24.7       | 26.7        | 32.8        | 14.8       |        |
| BMI                       | N=901       | N=1,673    | N=379       | N=897       | N=311      | <0.001 |
| Mean (SD)                 | 28.5 (4.7)  | 27.4 (4.6) | 28.1 (4.1)  | 28.5 (4.8)  | 25.9 (4.0) |        |
| Anemia                    | N=905       | N=1,599    | N=390       | N=901       | N=330      | <0.001 |
| No                        | 89.2        | 97.2       | 99.0        | 88.1        | 99.4       |        |
| Yes                       | 10.8        | 2.8        | 1.0         | 11.9        | 0.6        |        |
| Excessive erythrocytosis  | N=905       | N=1,599    | N=390       | N=901       | N=330      | <0.001 |
| No                        | 100.0       | 99.1       | 94.4        | 100.0       | 97.9       |        |
| Yes                       | 0.0         | 0.9        | 5.6         | 0.0         | 2.1        |        |
| Hemoglobin                | N=905       | N=1,599    | N=390       | N=901       | N=330      | <0.001 |
| Mean (SD)                 | 13.6 (1.4)  | 15.1 (1.7) | 17.1 (2.1)  | 13.7 (1.4)  | 16.4 (1.8) |        |
| Creatinine                | N=905       | N=1,682    | N=390       | N=901       | N=330      | <0.001 |
| Mean (SD)                 | 0.7 (0.2)   | 0.8 (0.2)  | 0.8 (0.3)   | 0.8 (0.3)   | 0.7 (0.1)  |        |
| eGFR categories           | N=905       | N=1,682    | N=390       | N=901       | N=330      | <0.001 |
| <60                       | 2.0         | 5.7        | 3.3         | 6.1         | 0.6        |        |
| 60-89                     | 25.8        | 49.5       | 55.4        | 40.3        | 27.3       |        |
| ≥90                       | 72.2        | 44.9       | 41.3        | 53.6        | 72.1       |        |
